# Supplementary material for: Fingolimod in children with Rett syndrome: the FINGORETT study
Source: Springer Nature journal article supplement (doi:10.1186/s13023-020-01655-7), 2021-01-06

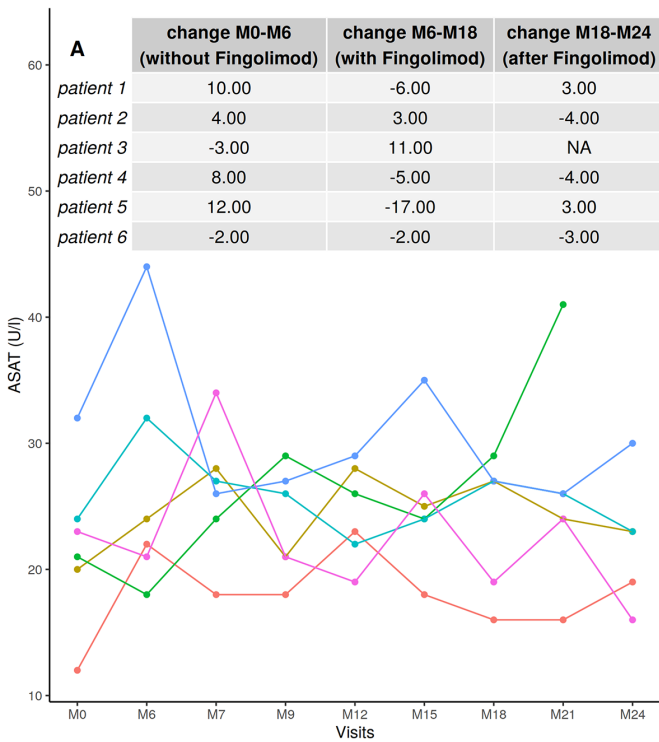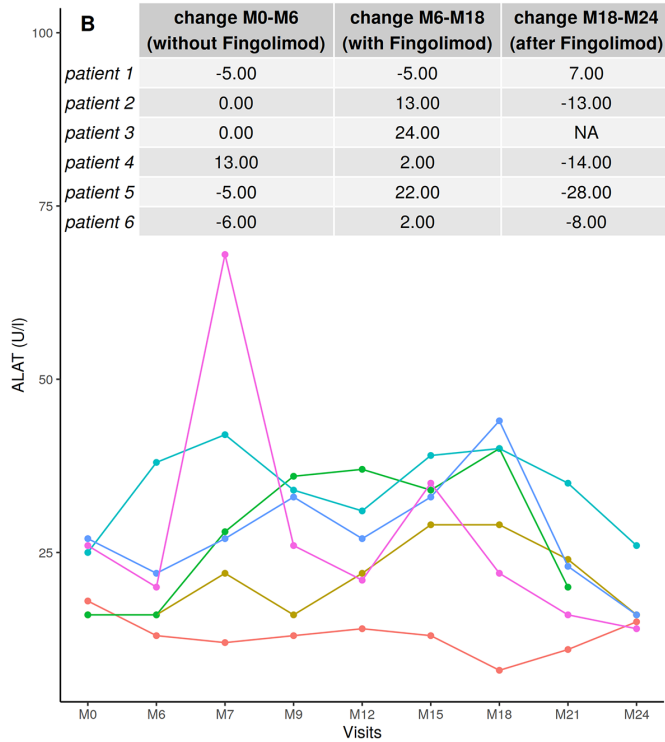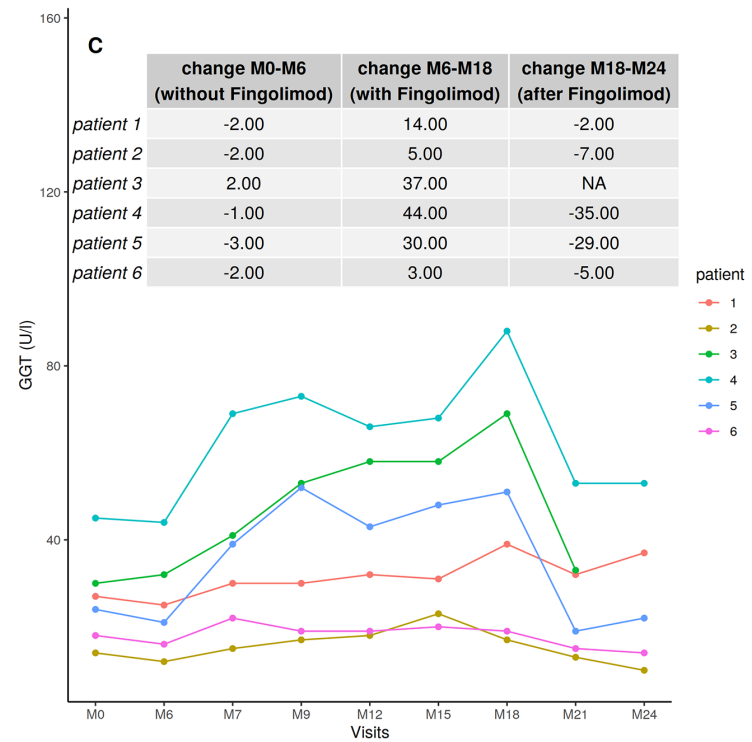

Supplement: MOESM8 [file 18741622]
