# Supplementary material for: Fingolimod in children with Rett syndrome: the FINGORETT study
Source: Springer Nature journal article supplement (doi:10.1186/s13023-020-01655-7), 2021-01-06

**A**

|                  | change M0-M6<br>(without Fingolimod) | change M6-M18<br>(with Fingolimod) | change M18-M24<br>(after Fingolimod) |
|------------------|--------------------------------------|------------------------------------|--------------------------------------|
| <i>patient 1</i> | 2.65                                 | -3.49                              | 2.46                                 |
| <i>patient 2</i> | -1.69                                | -5.09                              | 3.89                                 |
| <i>patient 3</i> | -0.54                                | -2.29                              | NA                                   |
| <i>patient 4</i> | -3.43                                | -3.84                              | 4.63                                 |
| <i>patient 5</i> | 0.22                                 | -3.71                              | 5.08                                 |
| <i>patient 6</i> | 0.05                                 | -2.11                              | 2.48                                 |

Leukocytes ( $\times 10^9/l$ )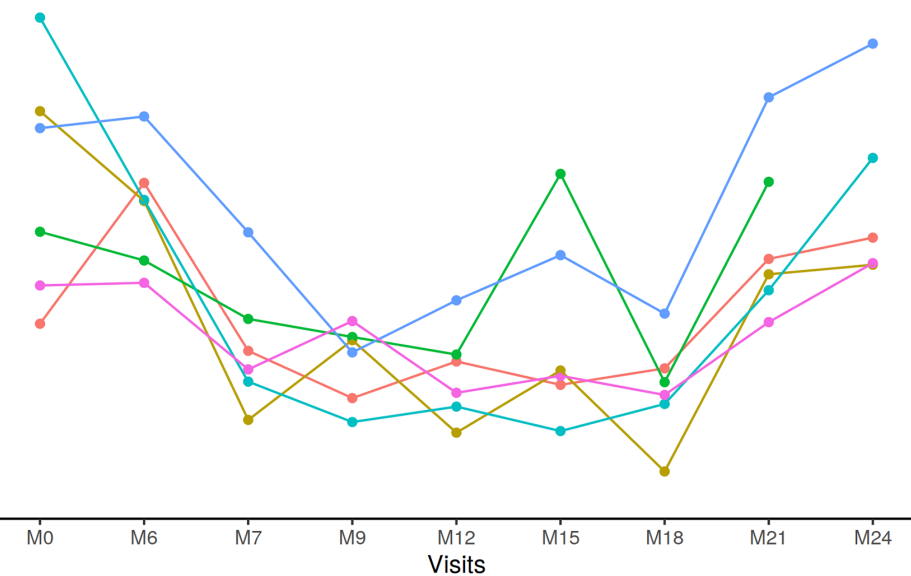**B**

|                  | change M0-M6<br>(without Fingolimod) | change M6-M18<br>(with Fingolimod) | change M18-M24<br>(after Fingolimod) |
|------------------|--------------------------------------|------------------------------------|--------------------------------------|
| <i>patient 1</i> | 0.48                                 | -1.99                              | 1.52                                 |
| <i>patient 2</i> | -0.54                                | -2.98                              | 2.54                                 |
| <i>patient 3</i> | 0.11                                 | -1.61                              | NA                                   |
| <i>patient 4</i> | 0.51                                 | -2.77                              | 0.57                                 |
| <i>patient 5</i> | 1.03                                 | -3.37                              | 3.47                                 |
| <i>patient 6</i> | 0.10                                 | -1.80                              | 1.15                                 |

Lymphocytes ( $\times 10^9/l$ )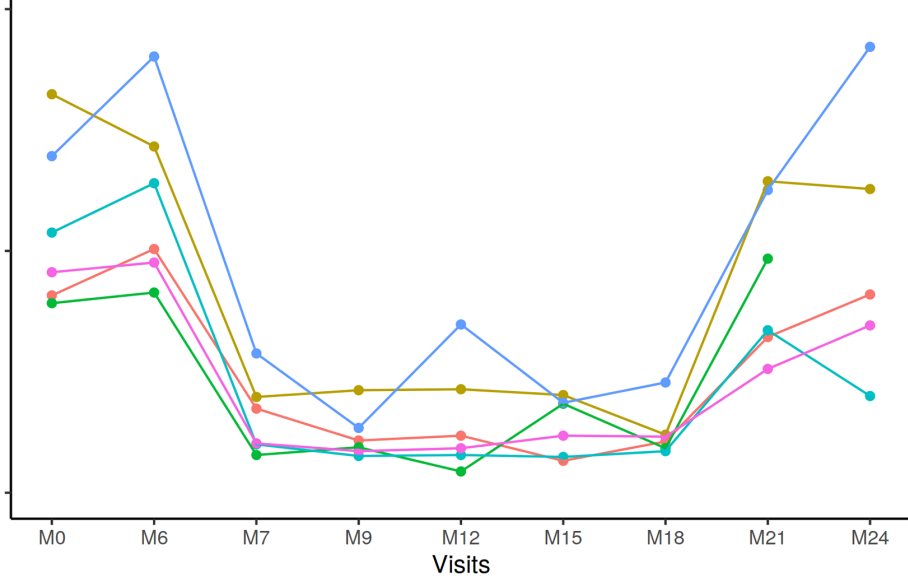

Supplement: MOESM9 [file 18741622]
